# Supplementary material
Source: PubMed Central journal article supplement (PMC3234165)

## **Supporting Information**

(Supplemental materials may be accessed free of charge online at <http://pubs.acs.org>)

### **Characterization of 4-Nitrophenylpropyl-*N*-alkylamine Interactions with Sigma Receptors**

Uyen B. Chu

Abdol R. Hajipour

Subramaniam Ramachandran

Arnold E. Ruoho

U.B.C, S.R., and A.E.R.

Department of Pharmacology, University of Wisconsin School of Medicine and Public Health,  
1300 University Avenue, Madison, Wisconsin 53706

A.R.H.

Pharmaceutical Research Laboratory, College of Chemistry, Isfahan University of Technology,  
Isfahan 84156, Iran

## Figure Legend

**Figure S-1:** Structure of tridemorph

**Figure S-2.** A heat map of the percent inhibition of PPC7, 4-NPPC7, PPC12, and 4-NPPC12 for a panel of membrane receptors and transporters. Data represent mean % inhibition (n = 4 determinations) at a default concentration of 10  $\mu$ M for each of the *N*-alkylamine derivatives tested. Significant inhibition is considered at  $\geq 50\%$ . *N*-alkylamine derivatives showing  $\geq 50\%$  inhibition at any of these targets was subsequently tested in competitive displacement secondary assays to determine the actual  $K_i$  values utilizing the Cheng-Prusoff equation (see Table 3).

**Figure S-1**

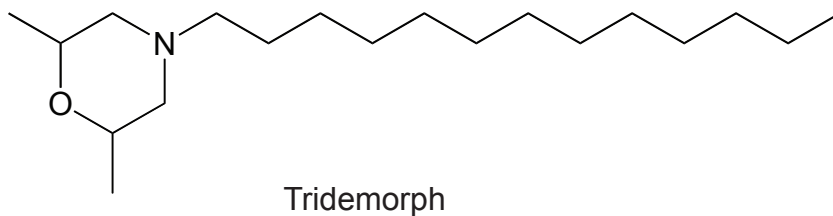

**Figure S-2**

|            | 2a    | 2b    | 3a    | 3b    |
|------------|-------|-------|-------|-------|
| Sig-1R     | 93.8  | 98.3  | 84    | 93.2  |
| Sig-2R     | 97.7  | 99.2  | 89.2  | 98.6  |
| 5HT1A      | 97.5  | 99.4  | 55.8  | 87.5  |
| 5HT1B      | 25.5  | 28.9  | 17.2  | 69.1  |
| 5HT1D      | 19.2  | 80.4  | -6.9  | 87    |
| 5HT1E      | 1.5   | 10.6  | 6.8   | 7.6   |
| 5HT2A      | 24.8  | 27.7  | 13.6  | 35.2  |
| 5HT2B      | 38.9  | 80.6  | 30.9  | 74    |
| 5HT2C      | 9.2   | 19.3  | 11.1  | 24.2  |
| 5HT3       | -2    | -2.4  | -6.7  | 2.7   |
| 5HT5A      | 6.6   | 25.6  | -0.4  | 28    |
| 5HT6       | -11.5 | -8.4  | -3.4  | 24.4  |
| 5HT7       | 19    | 73.9  | -2.7  | 44.2  |
| α-1A       | 97.7  | 96.8  | 20.1  | 106.2 |
| α-1B       | 11.9  | 33.7  | 27.8  | 45.2  |
| α-1D       | 94.6  | 105.6 | -1.8  | 84.3  |
| α-2A       | 14.1  | 28.7  | -15   | 49.7  |
| α-2C       | 23.9  | 43.2  | 0.1   | 47.4  |
| β-1        | 3.5   | 33.1  | -13.4 | -2.6  |
| β-2        | 1.4   | 18.8  | 25.4  | 52.8  |
| β-3        | -13.7 | 40.4  | 8     | 50    |
| BZP Rat    |       |       |       |       |
| Brain Site | 19.8  | 13    | 16.9  | 26.6  |
| D1         | 7     | 0     | -18.8 | 97.9  |
| D2         | 6.1   | 46.9  | -16.5 | -4.6  |
| D3         | 54.7  | 89.3  | 16.6  | 44.7  |
| D4         | 93    | 97    | 32.7  | 80.3  |
| D5         | -1    | 36.4  | 30.9  | 52.1  |
| DAT        | 35    | 67.3  | 16.4  | 41.6  |
| Gaba-A     |       |       |       |       |
| H1         | -2.8  | -2.3  | -5.2  | 0.2   |
| H2         | 20.5  | 74.4  | 67.3  | 42.7  |
| H3         | 45.5  | 106.5 | -3.6  | 80.2  |
| H4         | 24.9  | 27.1  | 37.3  | 78.3  |
| H4         | 7.9   | 17.3  | 8.2   | 16.3  |
| M1         | 0.1   | 78    | -0.5  | -8.9  |
| M2         | 5.4   | 47    | 0.6   | 19.5  |
| M3         | 8.4   | 41.8  | 18.8  | 18.6  |
| M4         | 6.4   | 52.3  | 9.9   | 19    |
| M5         | 14.1  | 63.3  | -17.4 | 19.7  |
| δ-OR       | -3.3  | -3.6  | 3.9   | 0.4   |
| κ-OR       | 21.3  | 39.2  | 7.8   | 15.4  |
| μ-OR       | -3.3  | -17   | 15.7  | 6.5   |
| NET        | 14.1  | 58.7  | -10.6 | 21.8  |
| SERT       | -12.3 | 65.5  | -12.5 | 70.5  |

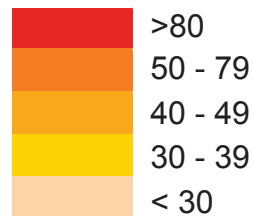

Supplement: NIHMS317964-supplement-1_si_001.pdf [file NIHMS317964-supplement-1_si_001.pdf]
